# Supplementary material for: The dark side of the black caiman: Shedding light on species dietary ecology and movement in Agami Pond, French Guiana
Source: PubMed Central journal article supplement (PMC6590786; doi:10.1371/journal.pone.0217239), 2019-06-24
Supplement: pone.0217239.s001.pdf [file pone.0217239.s001.pdf]

**S1 Table. Stable isotopic values.**  $\delta^{13}\text{C}$  and  $\delta^{15}\text{N}$  values for the different ecosystem compartments sampled across seasons (D1, W2, W3).

| SEASON | COMPARTMENT | REF | SPECIES                   | $\delta^{13}\text{C}$ | $\delta^{15}\text{N}$ | SIZE (cm) |
|--------|-------------|-----|---------------------------|-----------------------|-----------------------|-----------|
| D1     | CAIMAN      | C1  | <i>Melanosuchus niger</i> | -26,7                 | 5,0                   | 65        |
| D1     | CAIMAN      | C2  | <i>Melanosuchus niger</i> | -28,8                 | 5,2                   | 70        |
| D1     | CAIMAN      | C3  | <i>Melanosuchus niger</i> | -27,2                 | 5,2                   | 87        |
| D1     | CAIMAN      | C4  | <i>Melanosuchus niger</i> | -27,9                 | 5,4                   | 92        |
| D1     | CAIMAN      | C5  | <i>Melanosuchus niger</i> | -27,8                 | 6,3                   | 99        |
| D1     | CAIMAN      | C6  | <i>Melanosuchus niger</i> | -26,8                 | 6,1                   | 114       |
| D1     | CAIMAN      | C7  | <i>Melanosuchus niger</i> | -27,0                 | 6,3                   | 118       |
| D1     | CAIMAN      | C8  | <i>Melanosuchus niger</i> | -26,6                 | 6,3                   | 122       |
| D1     | CAIMAN      | C9  | <i>Melanosuchus niger</i> | -27,9                 | 6,8                   | 123       |
| D1     | CAIMAN      | C10 | <i>Melanosuchus niger</i> | -26,9                 | 6,8                   | 126       |
| D1     | CAIMAN      | C11 | <i>Melanosuchus niger</i> | -27,4                 | 7,0                   | 132       |
| D1     | CAIMAN      | C12 | <i>Melanosuchus niger</i> | -27,2                 | 7,2                   | 136       |
| D1     | CAIMAN      | C13 | <i>Melanosuchus niger</i> | -27,0                 | 6,8                   | 139       |
| D1     | CAIMAN      | C14 | <i>Melanosuchus niger</i> | -26,7                 | 7,1                   | 145       |
| D1     | CAIMAN      | C15 | <i>Melanosuchus niger</i> | -26,5                 | 6,7                   | 147       |
| D1     | CAIMAN      | C16 | <i>Melanosuchus niger</i> | -25,8                 | 7,6                   | 149       |
| D1     | CAIMAN      | C17 | <i>Melanosuchus niger</i> | -26,3                 | 7,6                   | 150       |
| D1     | CAIMAN      | C19 | <i>Melanosuchus niger</i> | -27,3                 | 6,8                   | 155       |
| D1     | CAIMAN      | C20 | <i>Melanosuchus niger</i> | -27,2                 | 7,6                   | 159       |
| D1     | CAIMAN      | C21 | <i>Melanosuchus niger</i> | -27,0                 | 7,2                   | 165       |
| D1     | CAIMAN      | C22 | <i>Melanosuchus niger</i> | -27,1                 | 7,4                   | 172       |
| D1     | CAIMAN      | C23 | <i>Melanosuchus niger</i> | -27,5                 | 6,9                   | 174       |
| D1     | CAIMAN      | C24 | <i>Melanosuchus niger</i> | -26,3                 | 7,4                   | 175       |
| D1     | CAIMAN      | C25 | <i>Melanosuchus niger</i> | -27,1                 | 7,4                   | 185       |
| D1     | CAIMAN      | C26 | <i>Melanosuchus niger</i> | -27,8                 | 7,5                   | 278       |
| D1     | CAIMAN      | C1  | <i>Melanosuchus niger</i> | -28,0                 | 3,3                   | 65        |

|    |        |     |                           |       |     |     |
|----|--------|-----|---------------------------|-------|-----|-----|
| D1 | CAIMAN | C2  | <i>Melanosuchus niger</i> | -28,5 | 3,9 | 70  |
| D1 | CAIMAN | C3  | <i>Melanosuchus niger</i> | -29,7 | 3,8 | 87  |
| D1 | CAIMAN | C4  | <i>Melanosuchus niger</i> | -28,9 | 4,2 | 92  |
| D1 | CAIMAN | C5  | <i>Melanosuchus niger</i> | -27,2 | 4,4 | 99  |
| D1 | CAIMAN | C6  | <i>Melanosuchus niger</i> | -26,4 | 4,5 | 114 |
| D1 | CAIMAN | C7  | <i>Melanosuchus niger</i> | -27,8 | 4,4 | 118 |
| D1 | CAIMAN | C8  | <i>Melanosuchus niger</i> | -28,4 | 5,3 | 122 |
| D1 | CAIMAN | C9  | <i>Melanosuchus niger</i> | -28,5 | 5,0 | 123 |
| D1 | CAIMAN | C10 | <i>Melanosuchus niger</i> | -27,2 | 5,7 | 126 |
| D1 | CAIMAN | C11 | <i>Melanosuchus niger</i> | -27,5 | 5,7 | 132 |
| D1 | CAIMAN | C12 | <i>Melanosuchus niger</i> | -27,9 | 5,8 | 136 |
| D1 | CAIMAN | C13 | <i>Melanosuchus niger</i> | -27,1 | 5,5 | 139 |
| D1 | CAIMAN | C14 | <i>Melanosuchus niger</i> | -27,1 | 5,9 | 145 |
| D1 | CAIMAN | C15 | <i>Melanosuchus niger</i> | -26,8 | 5,2 | 147 |
| D1 | CAIMAN | C16 | <i>Melanosuchus niger</i> | -26,0 | 6,3 | 149 |
| D1 | CAIMAN | C17 | <i>Melanosuchus niger</i> | -28,2 | 6,3 | 150 |
| D1 | CAIMAN | C18 | <i>Melanosuchus niger</i> | -27,8 | 6,0 | 155 |
| D1 | CAIMAN | C19 | <i>Melanosuchus niger</i> | -28,1 | 5,8 | 155 |
| D1 | CAIMAN | C20 | <i>Melanosuchus niger</i> | -27,5 | 6,2 | 159 |
| D1 | CAIMAN | C21 | <i>Melanosuchus niger</i> | -27,7 | 5,7 | 165 |
| D1 | CAIMAN | C22 | <i>Melanosuchus niger</i> | -27,3 | 5,9 | 172 |
| D1 | CAIMAN | C23 | <i>Melanosuchus niger</i> | -27,2 | 5,1 | 174 |
| D1 | CAIMAN | C24 | <i>Melanosuchus niger</i> | -27,0 | 5,9 | 175 |
| D1 | CAIMAN | C25 | <i>Melanosuchus niger</i> | -27,3 | 6,2 | 185 |
| D1 | CAIMAN | C26 | <i>Melanosuchus niger</i> | -28,7 | 6,5 | 278 |
| D1 | CAIMAN | C1  | <i>Melanosuchus niger</i> | -27,2 | 4,5 | 65  |
| D1 | CAIMAN | C2  | <i>Melanosuchus niger</i> | -28,0 | 5,1 | 70  |
| D1 | CAIMAN | C3  | <i>Melanosuchus niger</i> | -28,8 | 5,5 | 87  |
| D1 | CAIMAN | C4  | <i>Melanosuchus niger</i> | -28,0 | 5,9 | 92  |
| D1 | CAIMAN | C5  | <i>Melanosuchus niger</i> | -26,9 | 6,2 | 99  |

|    |        |     |                                    |       |     |     |
|----|--------|-----|------------------------------------|-------|-----|-----|
| D1 | CAIMAN | C6  | <i>Melanosuchus niger</i>          | -26,5 | 6,3 | 114 |
| D1 | CAIMAN | C7  | <i>Melanosuchus niger</i>          | -27,3 | 6,5 | 118 |
| D1 | CAIMAN | C8  | <i>Melanosuchus niger</i>          | -28,3 | 6,8 | 122 |
| D1 | CAIMAN | C9  | <i>Melanosuchus niger</i>          | -28,2 | 6,8 | 123 |
| D1 | CAIMAN | C10 | <i>Melanosuchus niger</i>          | -27,0 | 7,1 | 126 |
| D1 | CAIMAN | C11 | <i>Melanosuchus niger</i>          | -27,3 | 7,4 | 132 |
| D1 | CAIMAN | C12 | <i>Melanosuchus niger</i>          | -27,4 | 7,1 | 136 |
| D1 | CAIMAN | C13 | <i>Melanosuchus niger</i>          | -27,2 | 7,4 | 139 |
| D1 | CAIMAN | C14 | <i>Melanosuchus niger</i>          | -26,7 | 7,2 | 145 |
| D1 | CAIMAN | C15 | <i>Melanosuchus niger</i>          | -26,3 | 6,7 | 147 |
| D1 | CAIMAN | C16 | <i>Melanosuchus niger</i>          | -26,2 | 7,4 | 149 |
| D1 | CAIMAN | C17 | <i>Melanosuchus niger</i>          | -27,8 | 7,2 | 150 |
| D1 | CAIMAN | C18 | <i>Melanosuchus niger</i>          | -27,1 | 7,4 | 155 |
| D1 | CAIMAN | C19 | <i>Melanosuchus niger</i>          | -27,6 | 6,9 | 155 |
| D1 | CAIMAN | C20 | <i>Melanosuchus niger</i>          | -27,7 | 7,2 | 159 |
| D1 | CAIMAN | C21 | <i>Melanosuchus niger</i>          | -27,2 | 7,2 | 165 |
| D1 | CAIMAN | C22 | <i>Melanosuchus niger</i>          | -27,2 | 7,2 | 172 |
| D1 | CAIMAN | C23 | <i>Melanosuchus niger</i>          | -27,9 | 7,2 | 174 |
| D1 | CAIMAN | C24 | <i>Melanosuchus niger</i>          | -26,8 | 7,4 | 175 |
| D1 | CAIMAN | C25 | <i>Melanosuchus niger</i>          | -26,9 | 7,9 | 185 |
| D1 | CAIMAN | C26 | <i>Melanosuchus niger</i>          | -28,8 | 7,5 | 278 |
| D1 | FISH   | F4  | <i>Chaetobranchus flavescens</i>   | -27,5 | 6,6 |     |
| D1 | FISH   | F4  | <i>Chaetobranchus flavescens</i>   | -28,0 | 5,1 |     |
| D1 | FISH   | F4  | <i>Chaetobranchus flavescens</i>   | -28,7 | 6,4 |     |
| D1 | FISH   | F1  | <i>Hemigrammus sp</i>              | -31,0 | 5,2 |     |
| D1 | FISH   | F1  | <i>Hemigrammus sp</i>              | -30,6 | 4,5 |     |
| D1 | FISH   | F1  | <i>Hemigrammus sp</i>              | -30,8 | 4,9 |     |
| D1 | FISH   | F1  | <i>Hemigrammus sp</i>              | -30,3 | 5,1 |     |
| D1 | FISH   | F6  | <i>Hoplerythrinus unitaeniatus</i> | -27,5 | 7,4 |     |
| D1 | FISH   | F6  | <i>Hoplerythrinus unitaeniatus</i> | -26,7 | 9,3 |     |

|    |              |      |                                 |       |      |  |
|----|--------------|------|---------------------------------|-------|------|--|
| D1 | FISH         | F5   | <i>Hoplias malabaricus</i>      | -29,0 | 7,7  |  |
| D1 | FISH         | F5   | <i>Hoplias malabaricus</i>      | -28,0 | 8,3  |  |
| D1 | FISH         | F5   | <i>Hoplias malabaricus</i>      | -26,8 | 8,8  |  |
| D1 | FISH         | F3   | <i>Metynnix lippincottianus</i> | -30,7 | 4,1  |  |
| D1 | FISH         | F2   | <i>Pristella maxillaris</i>     | -29,4 | 5,4  |  |
| D1 | FISH         | F2   | <i>Pristella maxillaris</i>     | -28,5 | 5,2  |  |
| D1 | FISH         | F2   | <i>Pristella maxillaris</i>     | -28,7 | 5,6  |  |
| D1 | FISH         | F2   | <i>Pristella maxillaris</i>     | -26,9 | 6,4  |  |
| D1 | INVERTEBRATE | I1   | Aranea                          | -26,9 | 4,2  |  |
| D1 | INVERTEBRATE | I6   | Coleoptera                      | -29,2 | 3,7  |  |
| D1 | INVERTEBRATE | I2   | Diptera                         | -27,1 | 3,8  |  |
| D1 | INVERTEBRATE | I2   | Diptera                         | -26,5 | 3,3  |  |
| D1 | INVERTEBRATE | I5   | Hymenoptera                     | -25,7 | 4,8  |  |
| D1 | INVERTEBRATE | I4   | Odonata                         | -27,7 | 3,8  |  |
| D1 | INVERTEBRATE | I3   | Orthoptera                      | -26,1 | 4,2  |  |
| D1 | INVERTEBRATE | I3   | Orthoptera                      | -25,7 | 3,9  |  |
| D1 | PLANKTON     | P1   |                                 | -29,2 | -0,4 |  |
| D1 | PLANKTON     | P1   |                                 | -29,2 | 0,7  |  |
| D1 | PLANKTON     | P1   |                                 | -31,1 | 0,3  |  |
| D1 | PLANKTON     | P1   |                                 | -31,3 | 0,8  |  |
| D1 | PLANKTON     | P1   |                                 | -31,2 | 0,6  |  |
| D1 | PLANT        | PL6  | <i>Chrysobalanus icaco</i>      | -29,3 | 2,2  |  |
| D1 | PLANT        | PL8  | grand carex                     | -29,7 | 0,2  |  |
| D1 | PLANT        | PL9  | <i>Hydrocotyle umbellata</i>    | -30,6 | -2,2 |  |
| D1 | PLANT        | PL4  | <i>Irlbachia alata</i>          | -29,5 | 0,2  |  |
| D1 | PLANT        | PL10 | mini graminée                   | -29,8 | -0,2 |  |
| D1 | PLANT        | PL1  | <i>Nymphaea rudgeana</i>        | -26,5 | 0,0  |  |
| D1 | PLANT        | PL2  | <i>Pterocarpus officinales</i>  | -27,7 | 0,3  |  |
| D1 | PLANT        | PL5  | <i>Sagittaria lancifolia</i>    | -29,0 | 0,6  |  |
| D1 | PLANT        | PL3  | <i>Thelypteris interrupta</i>   | -29,1 | -1,7 |  |

|    |           |     |                               |       |     |     |
|----|-----------|-----|-------------------------------|-------|-----|-----|
| D1 | PLANT     | PL7 | <i>Utricularia hydrocarpa</i> | -31,1 | 1,7 |     |
| D1 | SHRIMP    | S1  | <i>Macrobrachium jelskii</i>  | -30,3 | 5,6 |     |
| D1 | SHRIMP    | S1  | <i>Macrobrachium jelskii</i>  | -30,6 | 7,1 |     |
| D1 | SHRIMP    | S1  | <i>Macrobrachium jelskii</i>  | -29,5 | 4,6 |     |
| D1 | SHRIMP    | S1  | <i>Macrobrachium jelskii</i>  | -29,4 | 7,1 |     |
| D1 | SHRIMP    | S1  | <i>Macrobrachium jelskii</i>  | -29,9 | 7,0 |     |
| W2 | AMPHIBIAN | A1  | <i>Pipa snethlageae</i>       | -29,5 | 8,0 |     |
| W2 | AMPHIBIAN | A1  | <i>Pipa snethlageae</i>       | -28,2 | 8,5 |     |
| W2 | BIRD      | O1  | <i>Agamia agami</i>           | -29,5 | 7,3 |     |
| W2 | BIRD      | O1  | <i>Agamia agami</i>           | -26,2 | 4,7 |     |
| W2 | BIRD      | O1  | <i>Agamia agami</i>           | -26,2 | 4,5 |     |
| W2 | BIRD      | O1  | <i>Agamia agami</i>           | -30,2 | 7,2 |     |
| W2 | BIRD      | O1  | <i>Agamia agami</i>           | -28,8 | 7,0 |     |
| W2 | BIRD      | O1  | <i>Agamia agami</i>           | -29,8 | 9,1 |     |
| W2 | BIRD      | O1  | <i>Agamia agami</i>           | -27,9 | 8,1 |     |
| W2 | BIRD      | O1  | <i>Agamia agami</i>           | -28,1 | 8,9 |     |
| W2 | BIRD      | O1  | <i>Agamia agami</i>           | -27,8 | 8,3 |     |
| W2 | BIRD      | O1  | <i>Agamia agami</i>           | -29,1 | 8,1 |     |
| W2 | BIRD      | O1  | <i>Agamia agami</i>           | -28,7 | 7,7 |     |
| W2 | BIRD      | O1  | <i>Agamia agami</i>           | -29,0 | 7,4 |     |
| W2 | BIRD      | O1  | <i>Agamia agami</i>           | -29,3 | 7,7 |     |
| W2 | BIRD      | O1  | <i>Agamia agami</i>           | -29,7 | 7,6 |     |
| W2 | BIRD      | O1  | <i>Agamia agami</i>           | -28,5 | 9,1 |     |
| W2 | BIRD      | O1  | <i>Agamia agami</i>           | -27,9 | 7,1 |     |
| W2 | BIRD      | O1  | <i>Agamia agami</i>           | -29,9 | 7,4 |     |
| W2 | BIRD      | O1  | <i>Agamia agami</i>           | -30,2 | 6,9 |     |
| W2 | CAIMAN    | C18 | <i>Melanosuchus niger</i>     | -25,6 | 7,3 | 155 |
| W2 | CAIMAN    | C27 | <i>Melanosuchus niger</i>     | -26,5 | 5,3 | 46  |
| W2 | CAIMAN    | C28 | <i>Melanosuchus niger</i>     | -27,6 | 4,9 | 50  |
| W2 | CAIMAN    | C29 | <i>Melanosuchus niger</i>     | -27,7 | 6,3 | 68  |

|    |        |     |                           |       |     |     |
|----|--------|-----|---------------------------|-------|-----|-----|
| W2 | CAIMAN | C30 | <i>Melanosuchus niger</i> | -28,0 | 4,7 | 83  |
| W2 | CAIMAN | C31 | <i>Melanosuchus niger</i> | -27,2 | 5,0 | 83  |
| W2 | CAIMAN | C32 | <i>Melanosuchus niger</i> | -28,4 | 5,1 | 86  |
| W2 | CAIMAN | C33 | <i>Melanosuchus niger</i> | -27,8 | 6,2 | 88  |
| W2 | CAIMAN | C34 | <i>Melanosuchus niger</i> | -27,7 | 6,2 | 89  |
| W2 | CAIMAN | C35 | <i>Melanosuchus niger</i> | -27,5 | 6,6 | 108 |
| W2 | CAIMAN | C36 | <i>Melanosuchus niger</i> | -26,3 | 6,5 | 126 |
| W2 | CAIMAN | C37 | <i>Melanosuchus niger</i> | -26,1 | 7,5 | 128 |
| W2 | CAIMAN | C38 | <i>Melanosuchus niger</i> | -27,0 | 6,5 | 132 |
| W2 | CAIMAN | C39 | <i>Melanosuchus niger</i> | -26,2 | 6,4 | 135 |
| W2 | CAIMAN | C40 | <i>Melanosuchus niger</i> | -27,3 | 7,0 | 140 |
| W2 | CAIMAN | C41 | <i>Melanosuchus niger</i> | -27,4 | 6,8 | 141 |
| W2 | CAIMAN | C42 | <i>Melanosuchus niger</i> | -24,8 | 6,9 | 142 |
| W2 | CAIMAN | C43 | <i>Melanosuchus niger</i> | -27,9 | 7,0 | 154 |
| W2 | CAIMAN | C44 | <i>Melanosuchus niger</i> | -25,7 | 7,1 | 158 |
| W2 | CAIMAN | C45 | <i>Melanosuchus niger</i> | -28,7 | 7,0 | 160 |
| W2 | CAIMAN | C46 | <i>Melanosuchus niger</i> | -28,1 | 7,2 | 183 |
| W2 | CAIMAN | C47 | <i>Melanosuchus niger</i> | -26,6 | 7,4 | 196 |
| W2 | CAIMAN | C48 | <i>Melanosuchus niger</i> | -28,1 | 7,4 | 210 |
| W2 | CAIMAN | C49 | <i>Melanosuchus niger</i> | -28,3 | 7,1 | 214 |
| W2 | CAIMAN | C50 | <i>Melanosuchus niger</i> | -27,9 | 7,2 | 216 |
| W2 | CAIMAN | C51 | <i>Melanosuchus niger</i> | -27,2 | 7,3 | 220 |
| W2 | CAIMAN | C52 | <i>Melanosuchus niger</i> | -27,2 | 7,1 | 221 |
| W2 | CAIMAN | C53 | <i>Melanosuchus niger</i> | -27,5 | 7,2 | 240 |
| W2 | CAIMAN | C54 | <i>Melanosuchus niger</i> | -27,6 | 7,4 | 326 |
| W2 | CAIMAN | C27 | <i>Melanosuchus niger</i> | -27,2 | 4,8 | 46  |
| W2 | CAIMAN | C28 | <i>Melanosuchus niger</i> | -27,7 | 3,6 | 50  |
| W2 | CAIMAN | C29 | <i>Melanosuchus niger</i> | -28,2 | 4,5 | 68  |
| W2 | CAIMAN | C30 | <i>Melanosuchus niger</i> | -27,6 | 2,6 | 83  |
| W2 | CAIMAN | C31 | <i>Melanosuchus niger</i> | -27,4 | 3,4 | 83  |

|    |        |     |                           |       |     |     |
|----|--------|-----|---------------------------|-------|-----|-----|
| W2 | CAIMAN | C32 | <i>Melanosuchus niger</i> | -28,3 | 3,1 | 86  |
| W2 | CAIMAN | C33 | <i>Melanosuchus niger</i> | -27,5 | 6,3 | 88  |
| W2 | CAIMAN | C34 | <i>Melanosuchus niger</i> | -27,3 | 4,1 | 89  |
| W2 | CAIMAN | C35 | <i>Melanosuchus niger</i> | -27,8 | 5,6 | 108 |
| W2 | CAIMAN | C36 | <i>Melanosuchus niger</i> | -28,2 | 5,6 | 126 |
| W2 | CAIMAN | C37 | <i>Melanosuchus niger</i> | -26,5 | 5,1 | 128 |
| W2 | CAIMAN | C38 | <i>Melanosuchus niger</i> | -28,1 | 6,0 | 132 |
| W2 | CAIMAN | C39 | <i>Melanosuchus niger</i> | -26,5 | 4,8 | 135 |
| W2 | CAIMAN | C40 | <i>Melanosuchus niger</i> | -28,1 | 6,1 | 140 |
| W2 | CAIMAN | C41 | <i>Melanosuchus niger</i> | -28,3 | 5,8 | 141 |
| W2 | CAIMAN | C42 | <i>Melanosuchus niger</i> | -26,7 | 5,4 | 142 |
| W2 | CAIMAN | C43 | <i>Melanosuchus niger</i> | -28,5 | 6,0 | 154 |
| W2 | CAIMAN | C44 | <i>Melanosuchus niger</i> | -27,0 | 5,5 | 158 |
| W2 | CAIMAN | C45 | <i>Melanosuchus niger</i> | -28,2 | 6,3 | 160 |
| W2 | CAIMAN | C46 | <i>Melanosuchus niger</i> | -28,5 | 6,0 | 183 |
| W2 | CAIMAN | C47 | <i>Melanosuchus niger</i> | -26,9 | 6,1 | 196 |
| W2 | CAIMAN | C48 | <i>Melanosuchus niger</i> | -28,4 | 6,2 | 210 |
| W2 | CAIMAN | C49 | <i>Melanosuchus niger</i> | -28,2 | 5,8 | 214 |
| W2 | CAIMAN | C50 | <i>Melanosuchus niger</i> | -28,0 | 6,2 | 216 |
| W2 | CAIMAN | C51 | <i>Melanosuchus niger</i> | -27,7 | 6,2 | 220 |
| W2 | CAIMAN | C52 | <i>Melanosuchus niger</i> | -27,6 | 6,0 | 221 |
| W2 | CAIMAN | C53 | <i>Melanosuchus niger</i> | -27,5 | 6,5 | 240 |
| W2 | CAIMAN | C54 | <i>Melanosuchus niger</i> | -27,7 | 6,2 | 326 |
| W2 | CAIMAN | C27 | <i>Melanosuchus niger</i> | -26,5 | 4,4 | 46  |
| W2 | CAIMAN | C28 | <i>Melanosuchus niger</i> | -28,2 | 4,6 | 50  |
| W2 | CAIMAN | C29 | <i>Melanosuchus niger</i> | -27,9 | 6,1 | 68  |
| W2 | CAIMAN | C30 | <i>Melanosuchus niger</i> | -26,8 | 3,3 | 83  |
| W2 | CAIMAN | C31 | <i>Melanosuchus niger</i> | -27,2 | 4,8 | 83  |
| W2 | CAIMAN | C32 | <i>Melanosuchus niger</i> | -27,5 | 4,3 | 86  |
| W2 | CAIMAN | C33 | <i>Melanosuchus niger</i> | -27,6 | 6,7 | 88  |

|    |        |     |                                    |       |      |     |
|----|--------|-----|------------------------------------|-------|------|-----|
| W2 | CAIMAN | C34 | <i>Melanosuchus niger</i>          | -27,1 | 5,5  | 89  |
| W2 | CAIMAN | C35 | <i>Melanosuchus niger</i>          | -27,3 | 6,7  | 108 |
| W2 | CAIMAN | C36 | <i>Melanosuchus niger</i>          | -27,5 | 6,6  | 126 |
| W2 | CAIMAN | C37 | <i>Melanosuchus niger</i>          | -25,9 | 6,9  | 128 |
| W2 | CAIMAN | C38 | <i>Melanosuchus niger</i>          | -27,7 | 6,8  | 132 |
| W2 | CAIMAN | C39 | <i>Melanosuchus niger</i>          | -26,4 | 6,3  | 135 |
| W2 | CAIMAN | C40 | <i>Melanosuchus niger</i>          | -27,6 | 7,7  | 140 |
| W2 | CAIMAN | C41 | <i>Melanosuchus niger</i>          | -27,2 | 7,1  | 141 |
| W2 | CAIMAN | C42 | <i>Melanosuchus niger</i>          | -26,5 | 6,7  | 142 |
| W2 | CAIMAN | C43 | <i>Melanosuchus niger</i>          | -27,3 | 7,2  | 154 |
| W2 | CAIMAN | C44 | <i>Melanosuchus niger</i>          | -26,9 | 6,8  | 158 |
| W2 | CAIMAN | C45 | <i>Melanosuchus niger</i>          | -27,6 | 7,3  | 160 |
| W2 | CAIMAN | C46 | <i>Melanosuchus niger</i>          | -28,0 | 7,1  | 183 |
| W2 | CAIMAN | C47 | <i>Melanosuchus niger</i>          | -26,7 | 7,4  | 196 |
| W2 | CAIMAN | C48 | <i>Melanosuchus niger</i>          | -28,0 | 7,5  | 210 |
| W2 | CAIMAN | C49 | <i>Melanosuchus niger</i>          | -27,9 | 7,1  | 214 |
| W2 | CAIMAN | C50 | <i>Melanosuchus niger</i>          | -27,6 | 7,1  | 216 |
| W2 | CAIMAN | C51 | <i>Melanosuchus niger</i>          | -27,2 | 7,5  | 220 |
| W2 | CAIMAN | C52 | <i>Melanosuchus niger</i>          | -27,3 | 7,0  | 221 |
| W2 | CAIMAN | C53 | <i>Melanosuchus niger</i>          | -27,7 | 7,5  | 240 |
| W2 | CAIMAN | C54 | <i>Melanosuchus niger</i>          | -27,1 | 7,5  | 326 |
| W2 | FISH   | F4  | <i>Chaetobranchus flavescens</i>   | -28,9 | 6,5  |     |
| W2 | FISH   | F4  | <i>Chaetobranchus flavescens</i>   | -28,7 | 6,8  |     |
| W2 | FISH   | F1  | <i>Hemigrammus sp</i>              | -29,3 | 6,6  |     |
| W2 | FISH   | F1  | <i>Hemigrammus sp</i>              | -25,6 | 6,6  |     |
| W2 | FISH   | F1  | <i>Hemigrammus sp</i>              | -28,4 | 5,4  |     |
| W2 | FISH   | F1  | <i>Hemigrammus sp</i>              | -32,1 | 5,8  |     |
| W2 | FISH   | F6  | <i>Hoplerythrinus unitaeniatus</i> | -26,3 | 8,7  |     |
| W2 | FISH   | F6  | <i>Hoplerythrinus unitaeniatus</i> | -28,1 | 10,5 |     |
| W2 | FISH   | F5  | <i>Hoplias malabaricus</i>         | -28,0 | 9,2  |     |



|    |              |      |                                 |       |      |  |
|----|--------------|------|---------------------------------|-------|------|--|
| W2 | FISH         | F5   | <i>Hoplias malabaricus</i>      | -28,0 | 9,7  |  |
| W2 | FISH         | F5   | <i>Hoplias malabaricus</i>      | -28,8 | 7,7  |  |
| W2 | FISH         | F3   | <i>Metynnis lippincottianus</i> | -31,6 | 2,7  |  |
| W2 | FISH         | F2   | <i>Pristella maxillaris</i>     | -31,0 | 6,8  |  |
| W2 | FISH         | F2   | <i>Pristella maxillaris</i>     | -30,7 | 5,5  |  |
| W2 | FISH         | F2   | <i>Pristella maxillaris</i>     | -29,3 | 4,3  |  |
| W2 | FISH         | F2   | <i>Pristella maxillaris</i>     | -28,7 | 6,9  |  |
| W2 | INVERTEBRATE | I1   | Aranea                          | -26,6 | 4,3  |  |
| W2 | INVERTEBRATE | I6   | Coleoptera                      | -29,2 | 3,4  |  |
| W2 | INVERTEBRATE | I2   | Diptera                         | -25,9 | 3,8  |  |
| W2 | INVERTEBRATE | I5   | Hymenoptera                     | -26,3 | 4,0  |  |
| W2 | INVERTEBRATE | I4   | Odonata                         | -30,3 | 4,2  |  |
| W2 | INVERTEBRATE | I4   | Odonata                         | -27,6 | 3,6  |  |
| W2 | INVERTEBRATE | I3   | Orthoptera                      | -26,2 | 4,0  |  |
| W2 | INVERTEBRATE | I3   | Orthoptera                      | -26,1 | 1,6  |  |
| W2 | PLANKTON     | P1   |                                 | -29,7 | 1,4  |  |
| W2 | PLANKTON     | P1   |                                 | -30,7 | 1,1  |  |
| W2 | PLANKTON     | P1   |                                 | -30,0 | -0,4 |  |
| W2 | PLANKTON     | P1   |                                 | -30,0 | 0,1  |  |
| W2 | PLANKTON     | P1   |                                 | -30,1 | 0,3  |  |
| W2 | PLANT        | PL6  | <i>Chrysobalanus icaco</i>      | -29,3 | 1,9  |  |
| W2 | PLANT        | PL8  | grand carex                     | -30,2 | 0,8  |  |
| W2 | PLANT        | PL9  | <i>Hydrocotyle umbellata</i>    | -30,8 | -2,8 |  |
| W2 | PLANT        | PL4  | <i>Irlbachia alata</i>          | -29,9 | 0,8  |  |
| W2 | PLANT        | PL10 | mini graminée                   | -29,2 | -0,3 |  |
| W2 | PLANT        | PL1  | <i>Nymphaea rudgeana</i>        | -26,1 | -0,1 |  |
| W2 | PLANT        | PL2  | <i>Pterocarpus officinales</i>  | -26,7 | 0,3  |  |
| W2 | PLANT        | PL5  | <i>Sagittaria lancifolia</i>    | -29,7 | 0,6  |  |
| W2 | PLANT        | PL3  | <i>Thelypteris interrupta</i>   | -28,2 | -1,3 |  |
| W2 | PLANT        | PL7  | <i>Utricularia hydrocarpa</i>   | -30,5 | 1,7  |  |

|    |           |     |                              |       |     |     |
|----|-----------|-----|------------------------------|-------|-----|-----|
| W2 | SHRIMP    | S1  | <i>Macrobrachium jelskii</i> | -29,3 | 5,1 |     |
| W2 | SHRIMP    | S1  | <i>Macrobrachium jelskii</i> | -29,2 | 6,0 |     |
| W2 | SHRIMP    | S1  | <i>Macrobrachium jelskii</i> | -30,4 | 5,9 |     |
| W2 | SHRIMP    | S1  | <i>Macrobrachium jelskii</i> | -29,8 | 6,1 |     |
| W2 | SHRIMP    | S1  | <i>Macrobrachium jelskii</i> | -30,4 | 6,2 |     |
| W2 | SHRIMP    | S1  | <i>Macrobrachium jelskii</i> | -28,5 | 5,3 |     |
| W3 | AMPHIBIAN | A1  | <i>Pipa snethlageae</i>      | -28,8 | 8,1 |     |
| W3 | AMPHIBIAN | A1  | <i>Pipa snethlageae</i>      | -29,4 | 9,0 |     |
| W3 | BIRD      | O1  | <i>Agamia agami</i>          | -30,0 | 7,9 |     |
| W3 | BIRD      | O1  | <i>Agamia agami</i>          | -28,6 | 7,3 |     |
| W3 | BIRD      | O1  | <i>Agamia agami</i>          | -29,7 | 7,5 |     |
| W3 | BIRD      | O1  | <i>Agamia agami</i>          | -29,9 | 7,7 |     |
| W3 | BIRD      | O1  | <i>Agamia agami</i>          | -28,7 | 7,6 |     |
| W3 | BIRD      | O1  | <i>Agamia agami</i>          | -28,8 | 7,3 |     |
| W3 | BIRD      | O1  | <i>Agamia agami</i>          | -28,5 | 7,7 |     |
| W3 | BIRD      | O1  | <i>Agamia agami</i>          | -28,8 | 8,3 |     |
| W3 | BIRD      | O1  | <i>Agamia agami</i>          | -28,7 | 7,7 |     |
| W3 | BIRD      | O1  | <i>Agamia agami</i>          | -28,7 | 8,1 |     |
| W3 | CAIMAN    | C55 | <i>Melanosuchus niger</i>    | -29,5 | 5,2 | 60  |
| W3 | CAIMAN    | C56 | <i>Melanosuchus niger</i>    | -26,8 | 5,8 | 77  |
| W3 | CAIMAN    | C57 | <i>Melanosuchus niger</i>    | -27,2 | 4,6 | 83  |
| W3 | CAIMAN    | C58 | <i>Melanosuchus niger</i>    | -27,1 | 4,1 | 86  |
| W3 | CAIMAN    | C59 | <i>Melanosuchus niger</i>    | -27,0 | 4,8 | 90  |
| W3 | CAIMAN    | C60 | <i>Melanosuchus niger</i>    | -27,3 | 5,3 | 95  |
| W3 | CAIMAN    | C61 | <i>Melanosuchus niger</i>    | -27,1 | 5,4 | 97  |
| W3 | CAIMAN    | C62 | <i>Melanosuchus niger</i>    | -27,4 | 6,0 | 102 |
| W3 | CAIMAN    | C63 | <i>Melanosuchus niger</i>    | -28,4 | 6,7 | 108 |
| W3 | CAIMAN    | C64 | <i>Melanosuchus niger</i>    | -27,2 | 6,1 | 109 |
| W3 | CAIMAN    | C65 | <i>Melanosuchus niger</i>    | -27,2 | 6,2 | 111 |
| W3 | CAIMAN    | C66 | <i>Melanosuchus niger</i>    | -27,1 | 6,2 | 112 |

|    |        |     |                           |       |     |     |
|----|--------|-----|---------------------------|-------|-----|-----|
| W3 | CAIMAN | C67 | <i>Melanosuchus niger</i> | -27,1 | 5,4 | 115 |
| W3 | CAIMAN | C68 | <i>Melanosuchus niger</i> | -27,3 | 7,2 | 190 |
| W3 | CAIMAN | C69 | <i>Melanosuchus niger</i> | -28,2 | 7,2 | 193 |
| W3 | CAIMAN | C70 | <i>Melanosuchus niger</i> | -26,3 | 7,3 | 195 |
| W3 | CAIMAN | C71 | <i>Melanosuchus niger</i> | -27,2 | 7,4 | 234 |
| W3 | CAIMAN | C72 | <i>Melanosuchus niger</i> | -25,8 | 7,6 | 254 |
| W3 | CAIMAN | C73 | <i>Melanosuchus niger</i> | -26,9 | 7,0 | 272 |
| W3 | CAIMAN | C74 | <i>Melanosuchus niger</i> | -26,8 | 7,0 | 320 |
| W3 | CAIMAN | C75 | <i>Melanosuchus niger</i> | -26,1 | 7,5 | 346 |
| W3 | CAIMAN | C55 | <i>Melanosuchus niger</i> | -28,4 | 3,6 | 60  |
| W3 | CAIMAN | C56 | <i>Melanosuchus niger</i> | -26,7 | 4,8 | 77  |
| W3 | CAIMAN | C57 | <i>Melanosuchus niger</i> | -26,7 | 2,7 | 83  |
| W3 | CAIMAN | C58 | <i>Melanosuchus niger</i> | -27,5 | 2,8 | 86  |
| W3 | CAIMAN | C59 | <i>Melanosuchus niger</i> | -27,6 | 3,2 | 90  |
| W3 | CAIMAN | C60 | <i>Melanosuchus niger</i> | -27,1 | 3,7 | 95  |
| W3 | CAIMAN | C61 | <i>Melanosuchus niger</i> | -27,5 | 3,5 | 97  |
| W3 | CAIMAN | C62 | <i>Melanosuchus niger</i> | -27,4 | 5,1 | 102 |
| W3 | CAIMAN | C63 | <i>Melanosuchus niger</i> | -27,9 | 5,5 | 108 |
| W3 | CAIMAN | C64 | <i>Melanosuchus niger</i> | -26,8 | 5,0 | 109 |
| W3 | CAIMAN | C65 | <i>Melanosuchus niger</i> | -26,8 | 5,1 | 111 |
| W3 | CAIMAN | C66 | <i>Melanosuchus niger</i> | -27,1 | 5,0 | 112 |
| W3 | CAIMAN | C67 | <i>Melanosuchus niger</i> | -27,4 | 4,6 | 115 |
| W3 | CAIMAN | C68 | <i>Melanosuchus niger</i> | -27,2 | 6,3 | 190 |
| W3 | CAIMAN | C69 | <i>Melanosuchus niger</i> | -28,5 | 6,1 | 193 |
| W3 | CAIMAN | C70 | <i>Melanosuchus niger</i> | -27,5 | 6,3 | 195 |
| W3 | CAIMAN | C71 | <i>Melanosuchus niger</i> | -27,8 | 6,2 | 234 |
| W3 | CAIMAN | C72 | <i>Melanosuchus niger</i> | -27,5 | 6,5 | 254 |
| W3 | CAIMAN | C73 | <i>Melanosuchus niger</i> | -27,3 | 5,9 | 272 |
| W3 | CAIMAN | C74 | <i>Melanosuchus niger</i> | -27,4 | 5,9 | 320 |
| W3 | CAIMAN | C75 | <i>Melanosuchus niger</i> | -27,9 | 6,2 | 346 |

|    |        |     |                                    |       |      |     |
|----|--------|-----|------------------------------------|-------|------|-----|
| W3 | CAIMAN | C55 | <i>Melanosuchus niger</i>          | -29,4 | 5,1  | 60  |
| W3 | CAIMAN | C56 | <i>Melanosuchus niger</i>          | -27,3 | 6,1  | 77  |
| W3 | CAIMAN | C57 | <i>Melanosuchus niger</i>          | -27,4 | 4,5  | 83  |
| W3 | CAIMAN | C58 | <i>Melanosuchus niger</i>          | -27,3 | 4,1  | 86  |
| W3 | CAIMAN | C59 | <i>Melanosuchus niger</i>          | -27,4 | 4,6  | 90  |
| W3 | CAIMAN | C60 | <i>Melanosuchus niger</i>          | -27,1 | 4,9  | 95  |
| W3 | CAIMAN | C61 | <i>Melanosuchus niger</i>          | -27,4 | 5,1  | 97  |
| W3 | CAIMAN | C62 | <i>Melanosuchus niger</i>          | -27,7 | 6,1  | 102 |
| W3 | CAIMAN | C63 | <i>Melanosuchus niger</i>          | -28,4 | 7,1  | 108 |
| W3 | CAIMAN | C64 | <i>Melanosuchus niger</i>          | -27,0 | 6,4  | 109 |
| W3 | CAIMAN | C65 | <i>Melanosuchus niger</i>          | -27,1 | 6,2  | 111 |
| W3 | CAIMAN | C66 | <i>Melanosuchus niger</i>          | -26,9 | 6,4  | 112 |
| W3 | CAIMAN | C67 | <i>Melanosuchus niger</i>          | -27,4 | 5,8  | 115 |
| W3 | CAIMAN | C68 | <i>Melanosuchus niger</i>          | -27,2 | 7,4  | 190 |
| W3 | CAIMAN | C69 | <i>Melanosuchus niger</i>          | -28,3 | 7,2  | 193 |
| W3 | CAIMAN | C70 | <i>Melanosuchus niger</i>          | -26,7 | 7,6  | 195 |
| W3 | CAIMAN | C71 | <i>Melanosuchus niger</i>          | -27,5 | 7,4  | 234 |
| W3 | CAIMAN | C72 | <i>Melanosuchus niger</i>          | -26,1 | 8,0  | 254 |
| W3 | CAIMAN | C73 | <i>Melanosuchus niger</i>          | -27,0 | 7,0  | 272 |
| W3 | CAIMAN | C74 | <i>Melanosuchus niger</i>          | -26,9 | 7,0  | 320 |
| W3 | CAIMAN | C75 | <i>Melanosuchus niger</i>          | -27,6 | 6,9  | 346 |
| W3 | FISH   | F4  | <i>Chaetobranchus flavescens</i>   | -29,5 | 6,0  |     |
| W3 | FISH   | F4  | <i>Chaetobranchus flavescens</i>   | -28,3 | 6,4  |     |
| W3 | FISH   | F1  | <i>Hemigrammus sp</i>              | -31,3 | 7,6  |     |
| W3 | FISH   | F1  | <i>Hemigrammus sp</i>              | -27,9 | 5,2  |     |
| W3 | FISH   | F1  | <i>Hemigrammus sp</i>              | -28,4 | 2,2  |     |
| W3 | FISH   | F1  | <i>Hemigrammus sp</i>              | -29,4 | 4,2  |     |
| W3 | FISH   | F6  | <i>Hoplerythrinus unitaeniatus</i> | -28,8 | 6,4  |     |
| W3 | FISH   | F6  | <i>Hoplerythrinus unitaeniatus</i> | -26,8 | 8,8  |     |
| W3 | FISH   | F5  | <i>Hoplias malabaricus</i>         | -27,2 | 10,0 |     |

|    |              |      |                                  |       |      |  |
|----|--------------|------|----------------------------------|-------|------|--|
| W3 | FISH         | F5   | <i>Hoplias malabaricus</i>       | -27,9 | 9,6  |  |
| W3 | FISH         | F5   | <i>Hoplias malabaricus</i>       | -26,9 | 8,1  |  |
| W3 | FISH         | F3   | <i>Metynniss lippincottianus</i> | -31,1 | 4,1  |  |
| W3 | FISH         | F2   | <i>Pristella maxillaris</i>      | -29,7 | 5,3  |  |
| W3 | FISH         | F2   | <i>Pristella maxillaris</i>      | -30,5 | 4,7  |  |
| W3 | FISH         | F2   | <i>Pristella maxillaris</i>      | -29,0 | 5,2  |  |
| W3 | FISH         | F2   | <i>Pristella maxillaris</i>      | -32,1 | 6,4  |  |
| W3 | INVERTEBRATE | I6   | Coleoptera                       | -30,7 | 3,2  |  |
| W3 | INVERTEBRATE | I2   | Diptera                          | -26,6 | 3,7  |  |
| W3 | INVERTEBRATE | I2   | Diptera                          | -26,3 | 3,8  |  |
| W3 | INVERTEBRATE | I5   | Hymenoptera                      | -26,3 | 4,0  |  |
| W3 | INVERTEBRATE | I4   | Odonata                          | -30,2 | 2,7  |  |
| W3 | INVERTEBRATE | I3   | Orthoptera                       | -27,7 | 0,5  |  |
| W3 | INVERTEBRATE | I3   | Orthoptera                       | -24,2 | 4,5  |  |
| W3 | PLANKTON     | P1   |                                  | -29,5 | 0,8  |  |
| W3 | PLANKTON     | P1   |                                  | -31,2 | 1,0  |  |
| W3 | PLANKTON     | P1   |                                  | -31,1 | 0,7  |  |
| W3 | PLANKTON     | P1   |                                  | -30,0 | 0,1  |  |
| W3 | PLANKTON     | P1   |                                  | -30,1 | 0,3  |  |
| W3 | PLANT        | PL6  | <i>Chrysobalanus icaco</i>       | -29,5 | 1,8  |  |
| W3 | PLANT        | PL8  | grand carex                      | -29,6 | -0,5 |  |
| W3 | PLANT        | PL9  | <i>Hydrocotyle umbellata</i>     | -29,1 | -1,7 |  |
| W3 | PLANT        | PL4  | <i>Irlbachia alata</i>           | -30,1 | 0,1  |  |
| W3 | PLANT        | PL10 | mini graminée                    | -30,4 | -0,5 |  |
| W3 | PLANT        | PL1  | <i>Nymphaea rudgeana</i>         | -25,5 | -0,9 |  |
| W3 | PLANT        | PL2  | <i>Pterocarpus officinales</i>   | -27,1 | 0,6  |  |
| W3 | PLANT        | PL5  | <i>Sagittaria lancifolia</i>     | -29,4 | -0,4 |  |
| W3 | PLANT        | PL3  | <i>Thelypteris interrupta</i>    | -28,3 | -1,7 |  |
| W3 | PLANT        | PL7  | <i>Utricularia hydrocarpa</i>    | -28,2 | 1,3  |  |
| W3 | SHRIMP       | S1   | <i>Macrobrachium jelskii</i>     | -29,5 | 6,4  |  |

|    |        |    |                              |       |     |  |
|----|--------|----|------------------------------|-------|-----|--|
| W3 | SHRIMP | S1 | <i>Macrobrachium jelskii</i> | -28,8 | 6,8 |  |
| W3 | SHRIMP | S1 | <i>Macrobrachium jelskii</i> | -28,7 | 6,8 |  |
| W3 | SHRIMP | S1 | <i>Macrobrachium jelskii</i> | -28,7 | 6,7 |  |
| W3 | SHRIMP | S1 | <i>Macrobrachium jelskii</i> | -30,0 | 5,1 |  |
| W3 | SHRIMP | S1 | <i>Macrobrachium jelskii</i> | -29,1 | 5,9 |  |
